# Supplementary material for: The formation mechanisms of porous silicon prepared from dense silicon monoxide
Source: Royal Society of Chemistry journal article supplement (doi:10.1039/c6ra27929e), 2017-01-01
Supplement: c6ra27929e1.pdf [file c6ra27929e1.pdf]

# The formation mechanics of porous silicon prepared from dense silicon monoxide

Shao-zhong Zeng, Xierong Zeng, Lin Huang, Hongliang Wu, Yuechao Yao, Xianfeng Zheng and Jizhao Zou\*

Table S1 The crystallite sizes of MgO and Si.

| Sample number | average crystallite size of MgO (nm) | crystallite size of Si before MgO removal (nm) | crystallite size of Si after MgO removal (nm) |
|---------------|--------------------------------------|------------------------------------------------|-----------------------------------------------|
| PSi-06        | 8                                    | 9                                              | 12                                            |
| PSi-12        | 7                                    | 8                                              | 11                                            |
| PSi-18        | 8                                    | 8                                              | 13                                            |
| PSi-24        | 10                                   | 11                                             | 13                                            |
| d-SiO         | /                                    | 4                                              | /                                             |
| PSi-06D       | 10                                   | 6                                              | 6                                             |
| PSi-12D       | 10                                   | 6                                              | 7                                             |
| PSi-18D       | 9                                    | 7                                              | 8                                             |
| PSi-24D       | 10                                   | 8                                              | 8                                             |

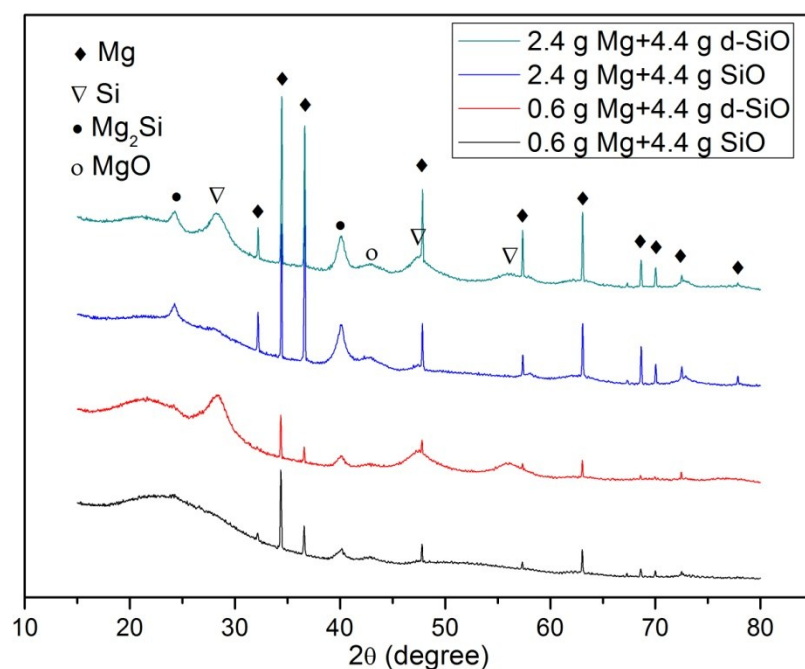

Fig.S1 Powder XRD of the samples prepared by treating the mixtures of Mg and SiO/d-SiO at 300 °C for 3 h.

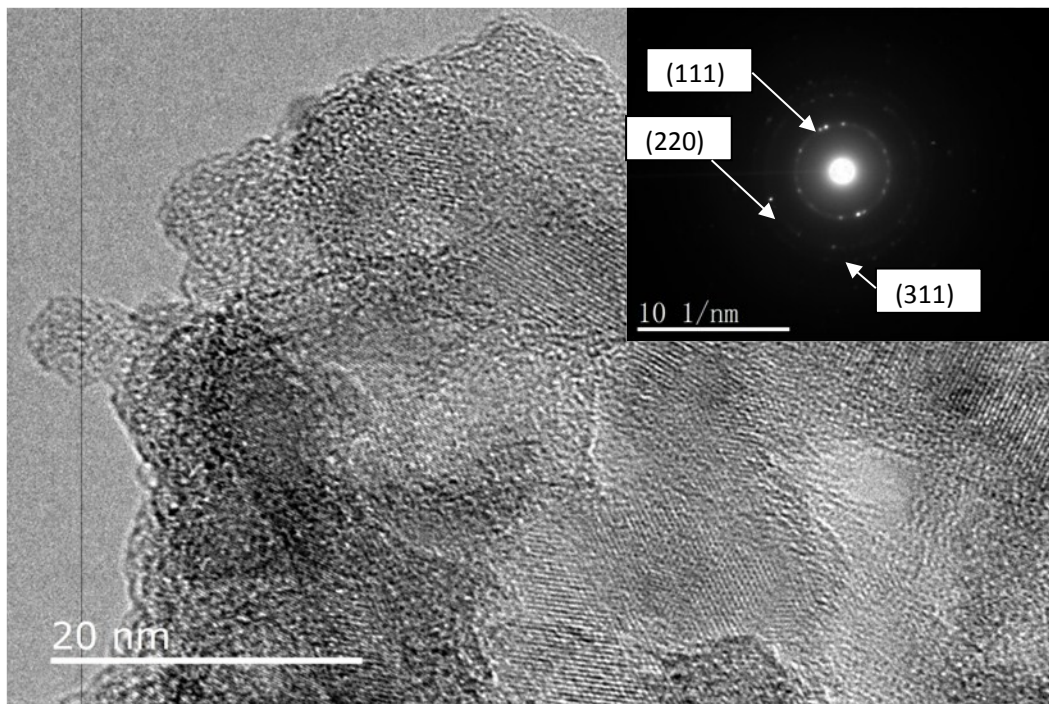

Fig.S2 High-resolution TEM image and SAED (inset) of PSi-24, silicon grains with size of ~10 nm are visible.

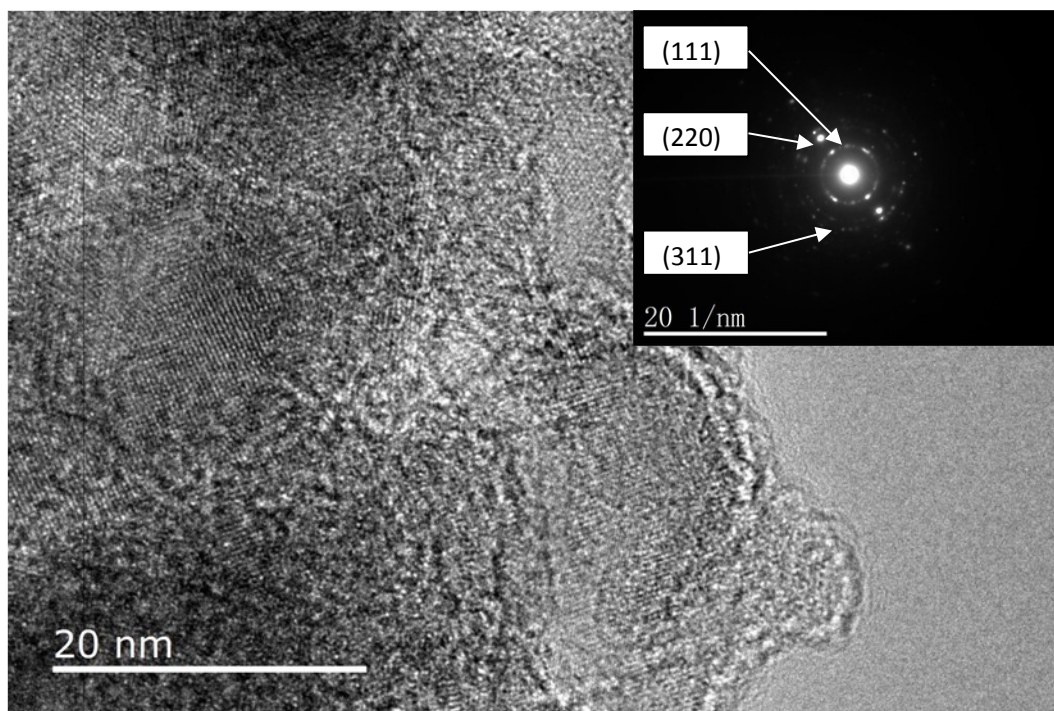

Fig.S3 High-resolution TEM image and SAED (inset) of PSi-24D, silicon grains with size of ~10 nm are visible.

Table S2 element contents of all PSi.

|         | Silicon content (%) | Oxygen content (%) | Magnesium content (%) |
|---------|---------------------|--------------------|-----------------------|
| PSi-06  | 70.25               | 29.18              | 0.57                  |
| PSi-12  | 73.58               | 25.33              | 1.10                  |
| PSi-18  | 83.90               | 15.43              | 0.67                  |
| PSi-24  | 85.05               | 14.03              | 0.92                  |
| PSi-06D | 61.36               | 38.65              | 0                     |
| PSi-12D | 74.76               | 24.29              | 0.95                  |
| PSi-18D | 84.68               | 14.56              | 0.76                  |
| PSi-24D | 90.25               | 8.40               | 1.36                  |

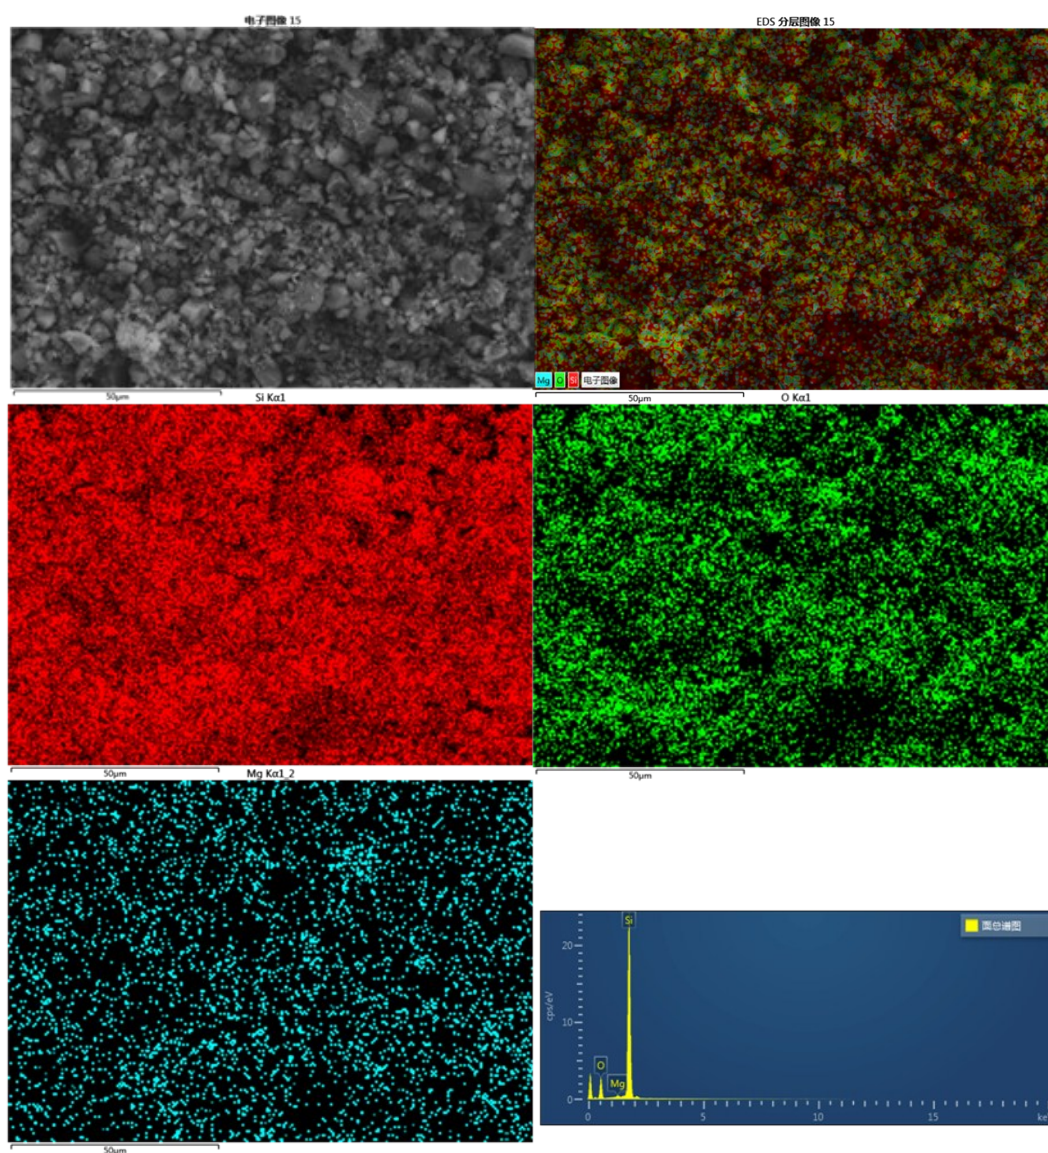

Fig.S4. EDS of PSi-18

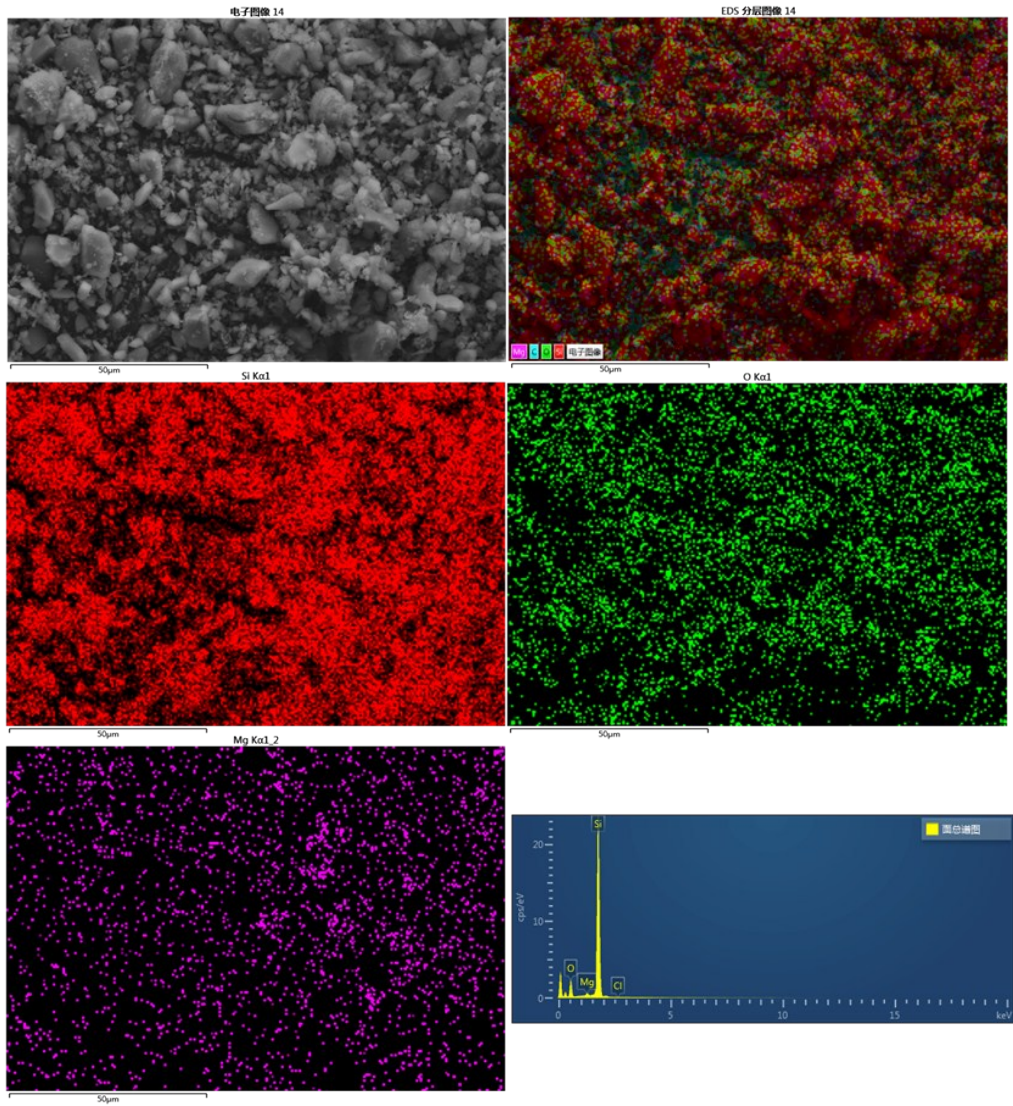

Fig. S5 EDS of PSi-24.

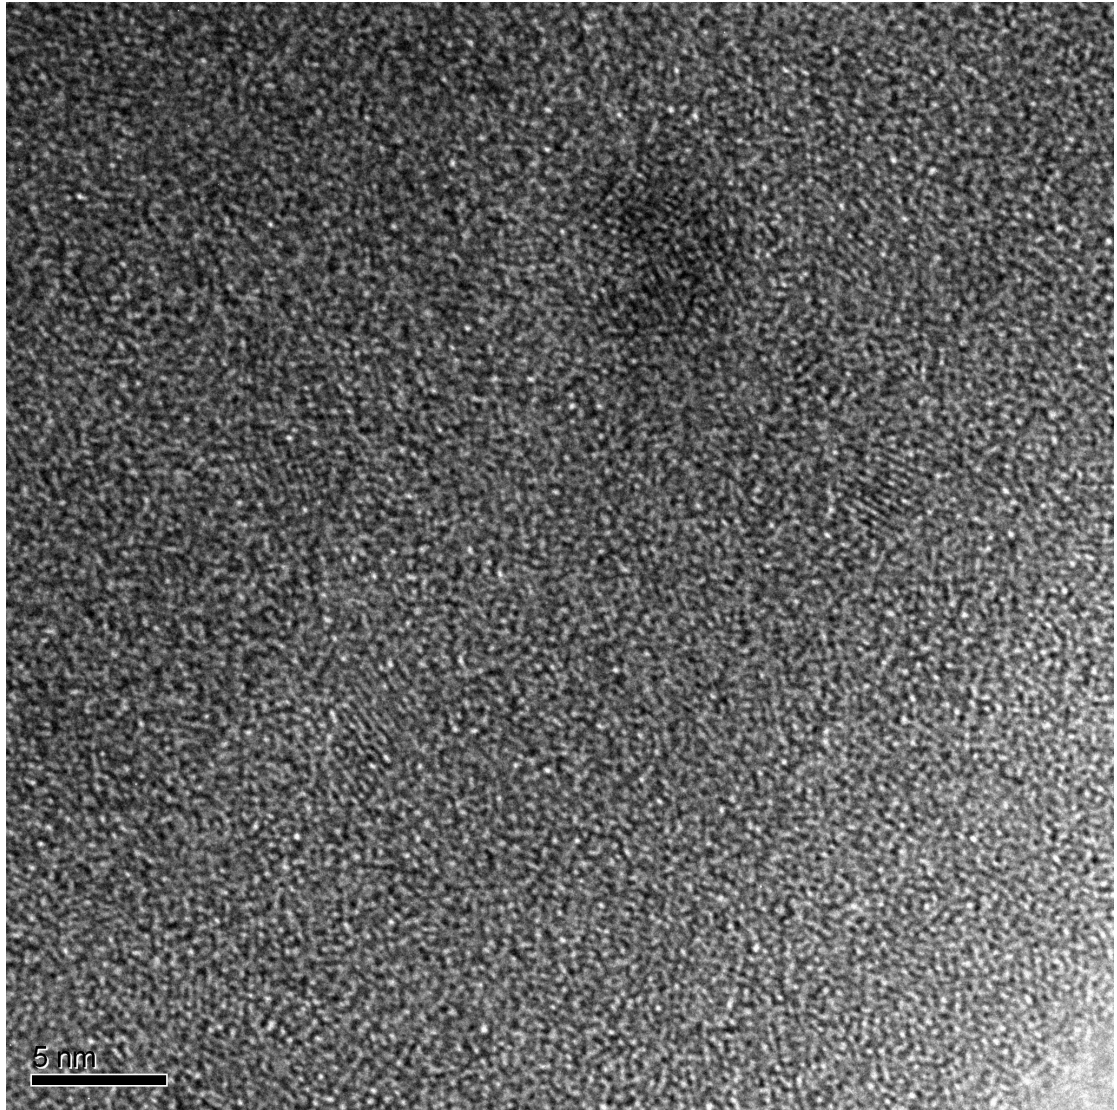

Fig. S6 High-resolution TEM image of d-SiO.
